# Supplementary material for: Tetrahedrally coordinated rigid crystal structure enables partial self-reduction of mixed-valence europium for optical thermometric application
Source: Royal Society of Chemistry journal article supplement (doi:10.1039/d2dt03988e), 2023-01-01
Supplement: d2dt03988e1.pdf [file d2dt03988e1.pdf]

## Supplementary Information

### Tetrahedrally coordinated rigid crystal structure enabled partial self-reduction of mixed-valence Europium for optical thermometric application

Zhichao Meng<sup>#</sup>, Yan Gao<sup>\*\*</sup>, Ji'an Song, Zelong Jiang, Wei Lv, Qingguang Zeng, Dawei Wen<sup>\*</sup>, Tao Hu<sup>\*</sup>

School of Applied Physics and Materials, Wuyi University, Jiangmen 529020, Guangdong Province, P. R. China

\*Corresponding author. E-mail: gaoyan\_chn@sina.com (Y. Gao), ontaii@163.com (D.W. Wen), hutaowyu@sina.com (T. Hu).

Fig. S1

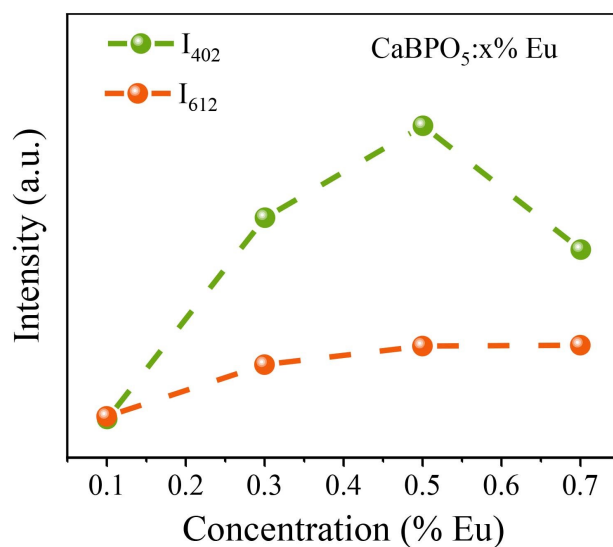

Fig. S1 The luminescence intensity of Eu<sup>2+</sup> emission at 402 nm and Eu<sup>3+</sup> emission at 612 nm for the CaBPO<sub>5</sub>:x%Eu (x = 0.1, 0.3, 0.5, 0.7) samples.

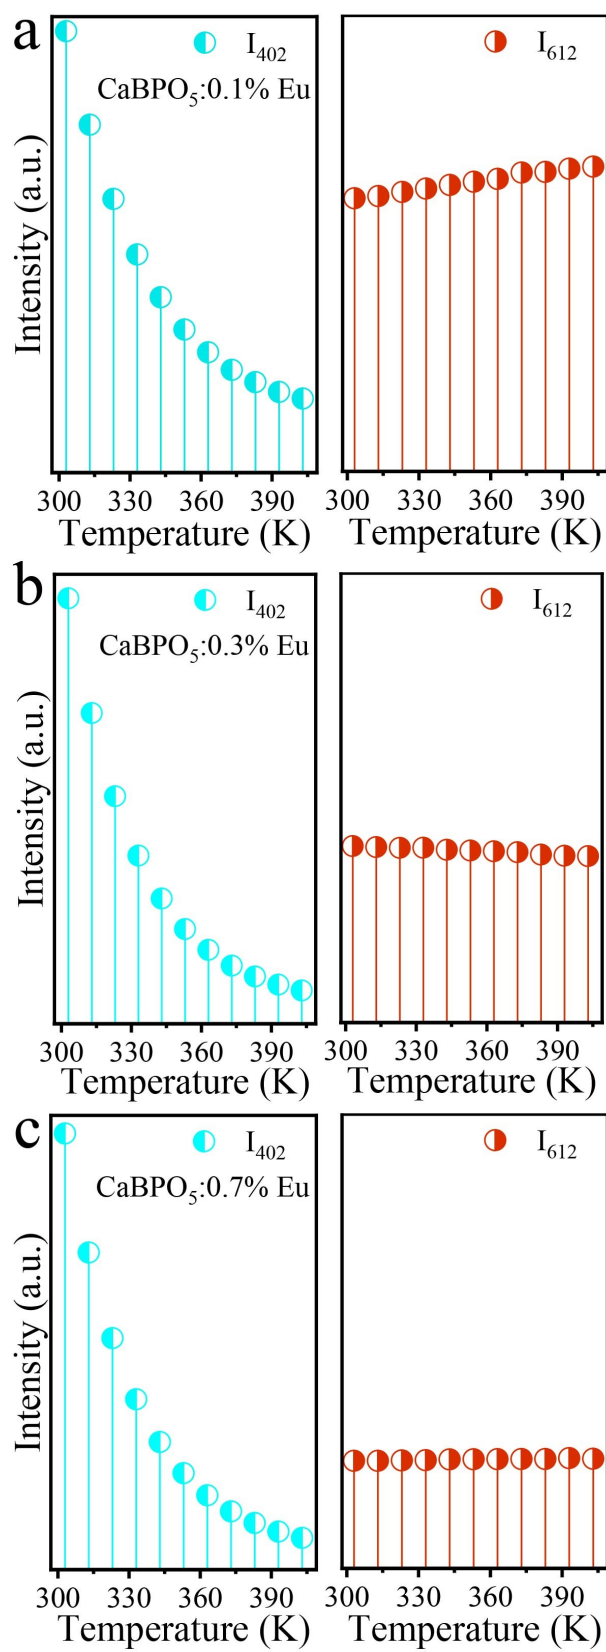

**Fig. S2**

**Fig. S2** (a-c) The emission intensity of  $\text{Eu}^{2+}$  and  $\text{Eu}^{3+}$  at different temperatures for the  $\text{CaBPO}_5$ : $x\%$ Eu ( $x = 0.1, 0.3, 0.7$ ) samples.

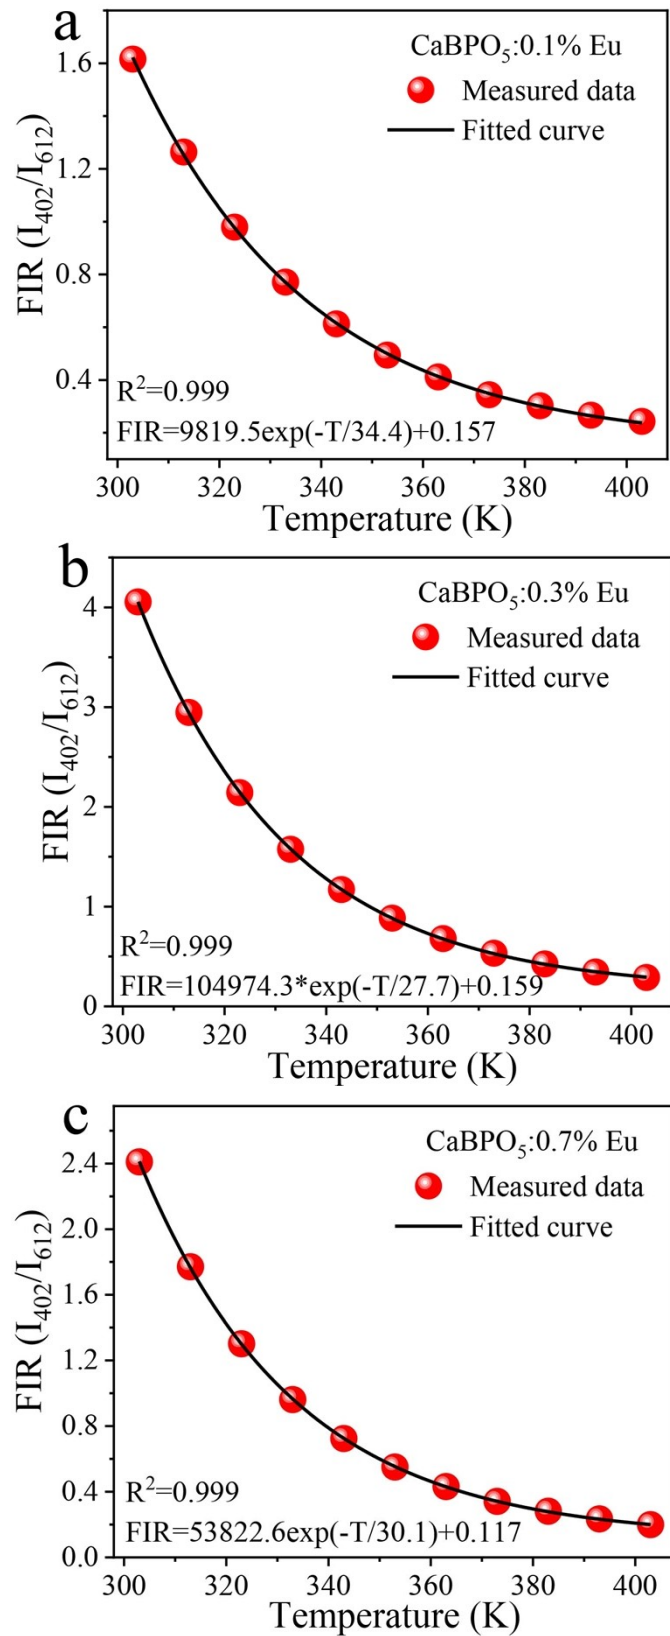

**Fig. S3**

**Fig. S3** (a-c) Experimentally measured and Eq. 4 fitted plots of FIR ( $I_{402}/I_{612}$ ) versus temperature for the CaBPO<sub>5</sub>:x%Eu ( $x = 0.1, 0.3, 0.7$ ) samples.

To convert the HRBE-scheme into a VRBE-scheme, the ground state of  $\text{Eu}^{2+}$   $E_{4f}(7,2+,A)$  in VRBE was calculated by the following equation:<sup>1</sup>

$$E_{4f}(7,2+,A) = -24.92 + \frac{18.05 - U(6,A)}{0.777 - 0.0353U(6,A)} \quad \text{Equation S1}$$

where  $U(6,A)$  is the Coulomb repulsion energy between a 4f-electron in  $\text{Eu}^{2+}$  and in  $\text{Eu}^{3+}$ . The value of  $U(6,A)$  was estimated by the centroid shift  $\varepsilon_c$  of  $\text{Ce}^{3+}$  according the following equation:<sup>2</sup>

$$U(6,A) = 5.44 + 2.834 \times e^{-\varepsilon_c/2.2} \quad \text{Equation S2}$$

The centroid shift was calculated according to the Equation S3:<sup>3</sup>

$$\varepsilon_c = 1.79 \times 10^{13} \sum_{i=1}^N \frac{\alpha_{sp}^0}{(R_o - 0.6\Delta R)^6} \quad \text{Equation S3}$$

Where  $R_o$  is the distance between  $\text{Ce}^{3+}$  and the coordinating ions  $\text{O}^{2-}$  based on DFT structural relaxation,  $\Delta R$  is the radii difference between  $\text{Ce}^{3+}$  and the replaced ion ( $\text{Ca}^{2+}$  in this case),  $\alpha_{sp}^0$  is the polarizability of  $\text{O}^{2-}$ .  $\alpha_{sp}^0$  can be calculated using the average electronegativity  $x_{av}$  of cations in the host:

$$\alpha_{sp}^0 = 0.33 + \frac{4.8}{x_{av}^2} \quad \text{Equation S4}$$

## References

- 1 P. Dorenbos, Lanthanide 4f-electron binding energies and the nephelauxetic effect in wide band gap compounds, *J. Lumin.*, 2013, **136**, 122-129.
- 2 P. Dorenbos,  $\text{Ce}^{3+}$  5d-centroid shift and vacuum referred 4f-electron binding energies of all lanthanide impurities in 150 different compounds, *J. Lumin.*, 2013, **135**, 93-104.
- 3 A. A. Setlur, D. G. Porob, U. Happek and M. G. Brik, Inhomogenous Broadening, Charge Compensation, and Luminescence Quenching in  $\text{Ce}^{3+}$ -Doped  $\text{Sr}_3\text{AlO}_4\text{F}$  Phosphors, *ECS J. Solid State Sci. Technol.*, 2016, **5**, R3089.
